# Supplementary material
Source: publisher figshare collection journal article supplement (https://karger.figshare.com/ndownloader/files/28249341)
Supplement: Supplementary file 1 [file 28249341]

Long term risk of autoimmune diseases other than systemic lupus erythematosus in cutaneous lupus erythematosus-alone patients: a 10-year nationwide cohort study

Short title: Risk of autoimmune diseases in cutaneous lupus erythematosus-alone patients

Teng-Li Lin, MD,<sup>1</sup> Chun-Ying Wu, MD, PhD, MPH, LL.M.,<sup>2-7</sup> Chao-Kuei Juan, MD,<sup>1,2</sup> Yun-Ting Chang, MD, PhD,<sup>2,8</sup> Yi-Ju Chen MD, PhD,<sup>1,2,7\*</sup>

Supplementary Fig. 1. Flow chart for patient selection

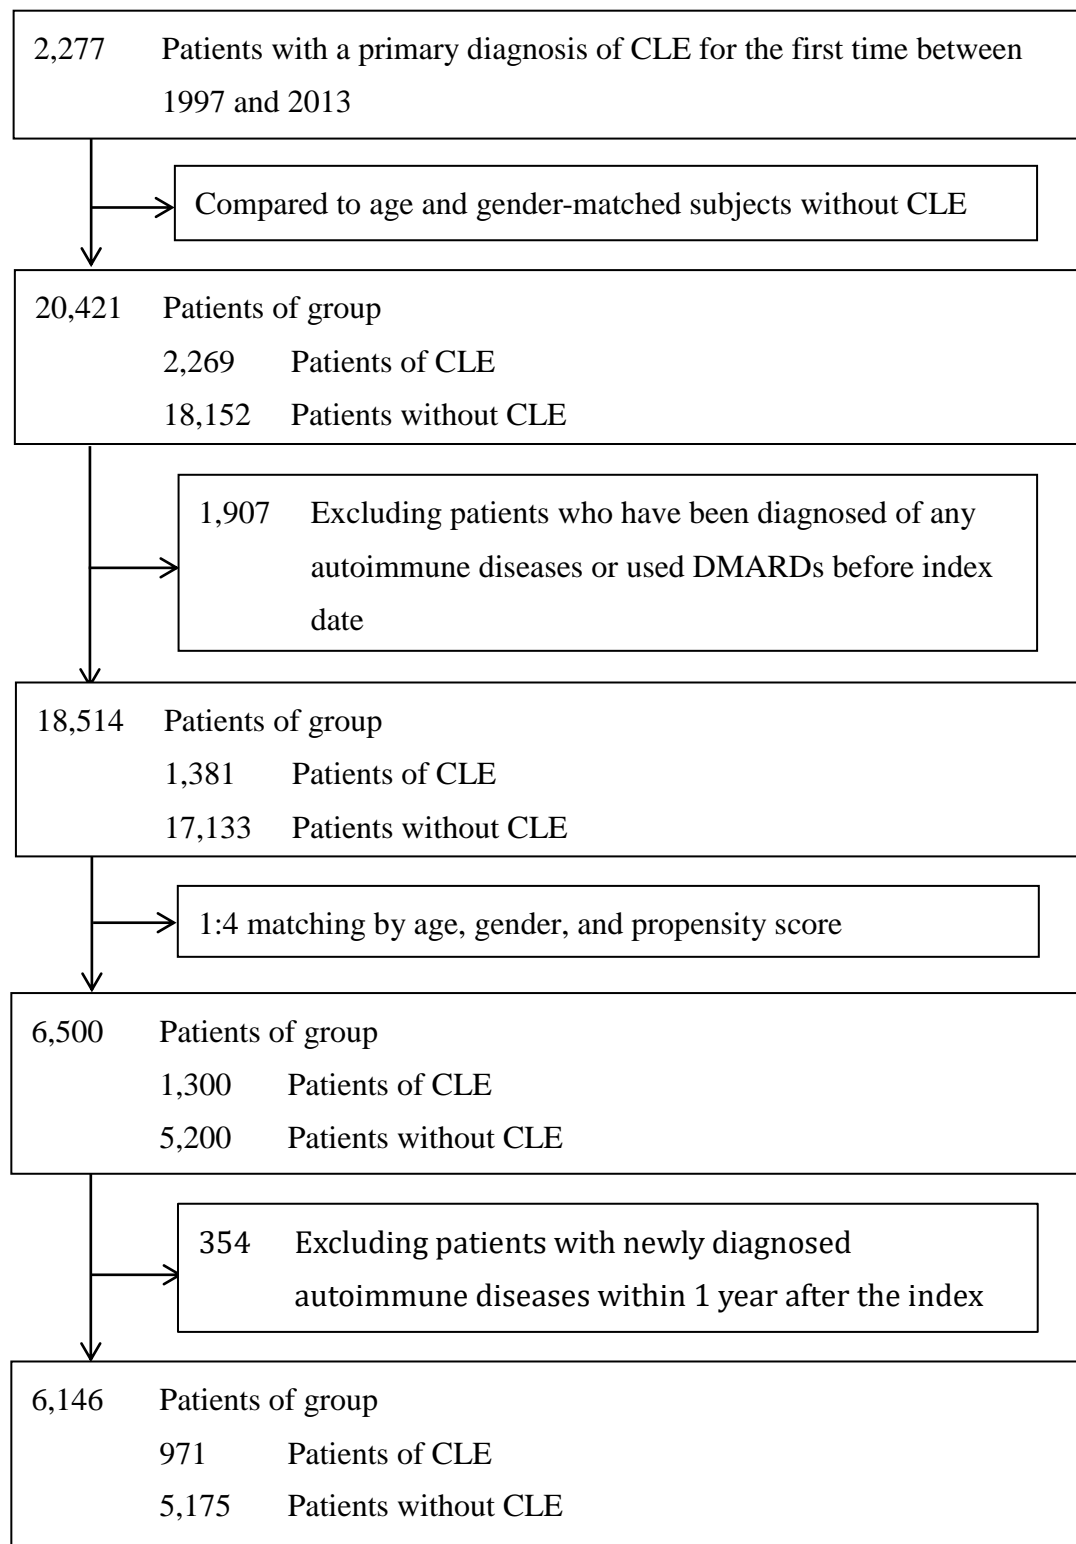

Abbreviation: CLE, cutaneous lupus erythematosus; DMARDs, disease-modifying antirheumatic drugs
